# Supplementary material for: Rate enhancement of the catechol oxidase activity of a series of biomimetic monocopper(ii) complexes by introduction of non-coordinating groups in N-tripodal ligands
Source: Royal Society of Chemistry journal article supplement (doi:10.1039/c2nj40265c), 2012-01-01

# Electronic Supplementary Information

## Rate enhancement of the catechol oxidase activity for a series of biomimetic monocopper(II) complexes by introduction of uncoordinating groups on *N*-tripodal ligands

Ronan Marion<sup>[a]</sup>, Nidal M. Saleh<sup>[a]</sup>, Nicolas Le Poul<sup>[b]</sup>, Didier Floner<sup>[a]</sup>, Olivier Lavastre<sup>[c]</sup>, Florence Geneste\*<sup>[a]</sup>

<sup>[a]</sup>Université de Rennes 1, UMR-CNRS 6226, Laboratoire des Sciences Chimiques de Rennes, Equipe Matière Condensée et Systèmes Electroactifs, Campus de Beaulieu, 35042 Rennes cedex, France, Fax: +33 2 23 23 59 67, E-mail address: [florence.geneste@univ-rennes1.fr](mailto:florence.geneste@univ-rennes1.fr)

<sup>[b]</sup>Laboratoire de Chimie, Electrochimie Moléculaires et Chimie Analytique, CNRS, UMR 6521, Université Européenne de Bretagne à Brest, 6 av. Le Gorgeu, 29238 Brest cedex, France

<sup>[c]</sup>Université de Rennes 1, UMR-CNRS 6164, Institut d'Electronique et Télécommunications de Rennes, Campus de Beaulieu, 35042 Rennes cedex, France

Figure 1: EPR spectra in frozen CH<sub>3</sub>OH solution of 10<sup>-2</sup> mol L<sup>-1</sup> metal complexes (**4a**, **4b**, **4c** and **4d**) at 69 K

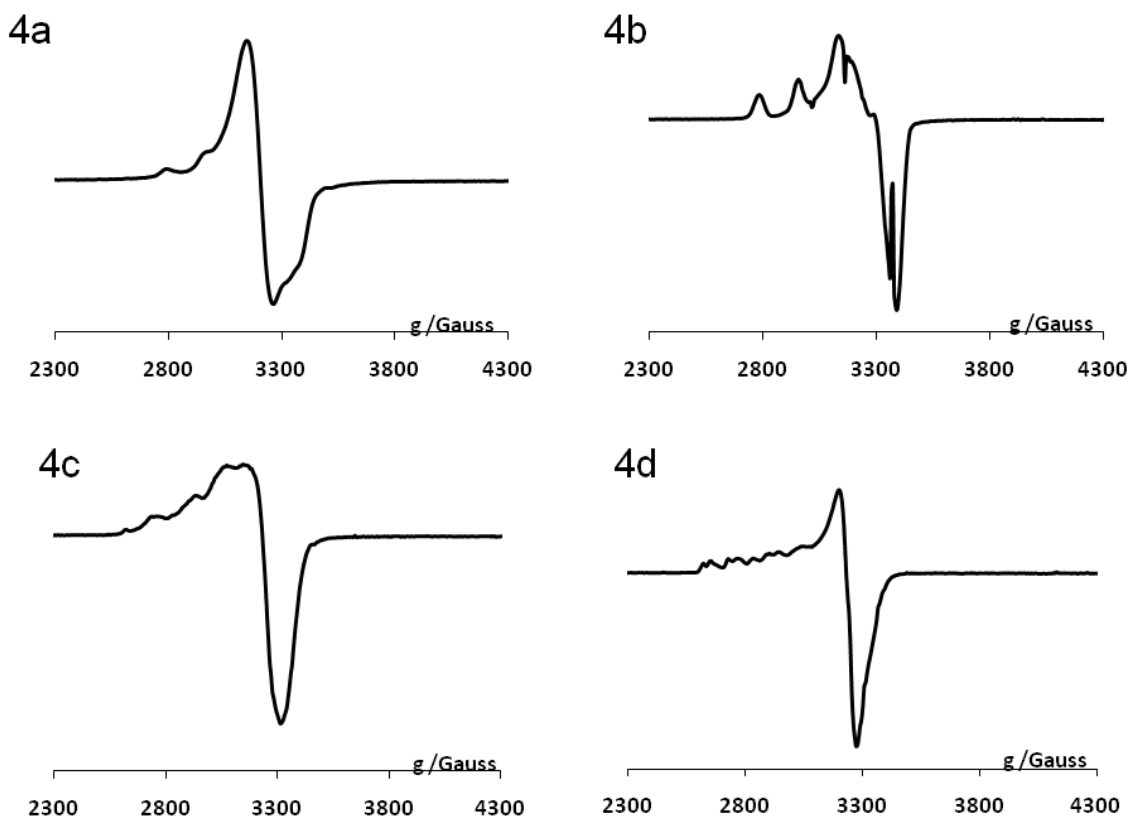

Figure 2 : Absorption spectra of **4a**, **4b**, **4c** and **4d** ( $\text{CH}_3\text{OH}$  solution of  $10^{-2} \text{ mol L}^{-1}$  metal complex at 298 K)

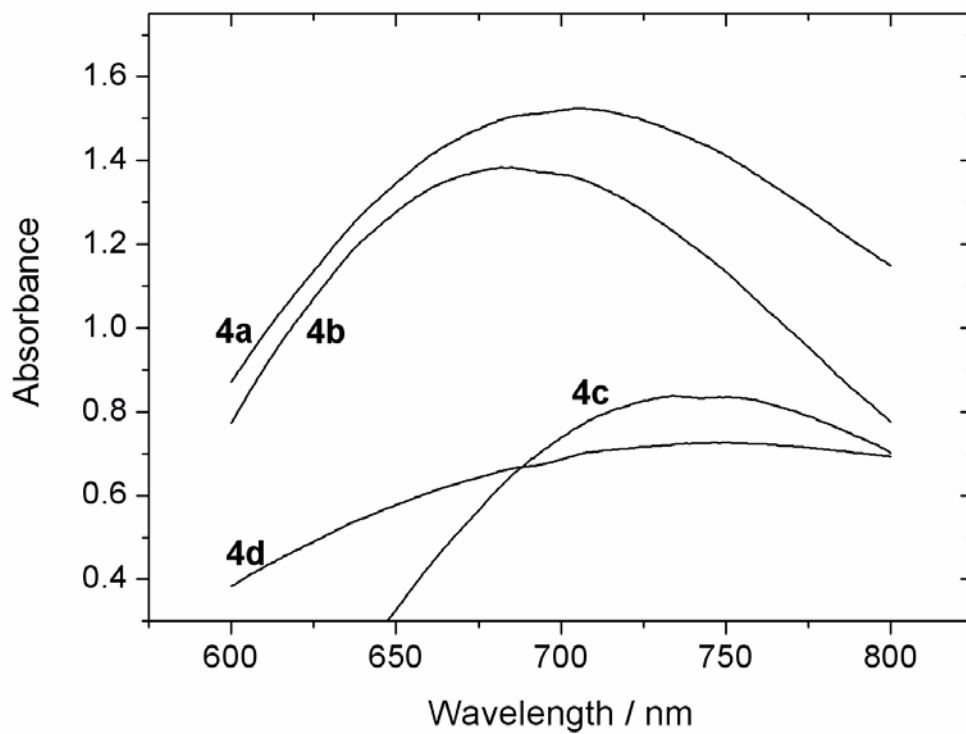

Figure 3:  $^1\text{H}$  and  $^{13}\text{C}$  NMR spectra of **3a**, **3b**, **3c** and **3d** in  $\text{CDCl}_3$

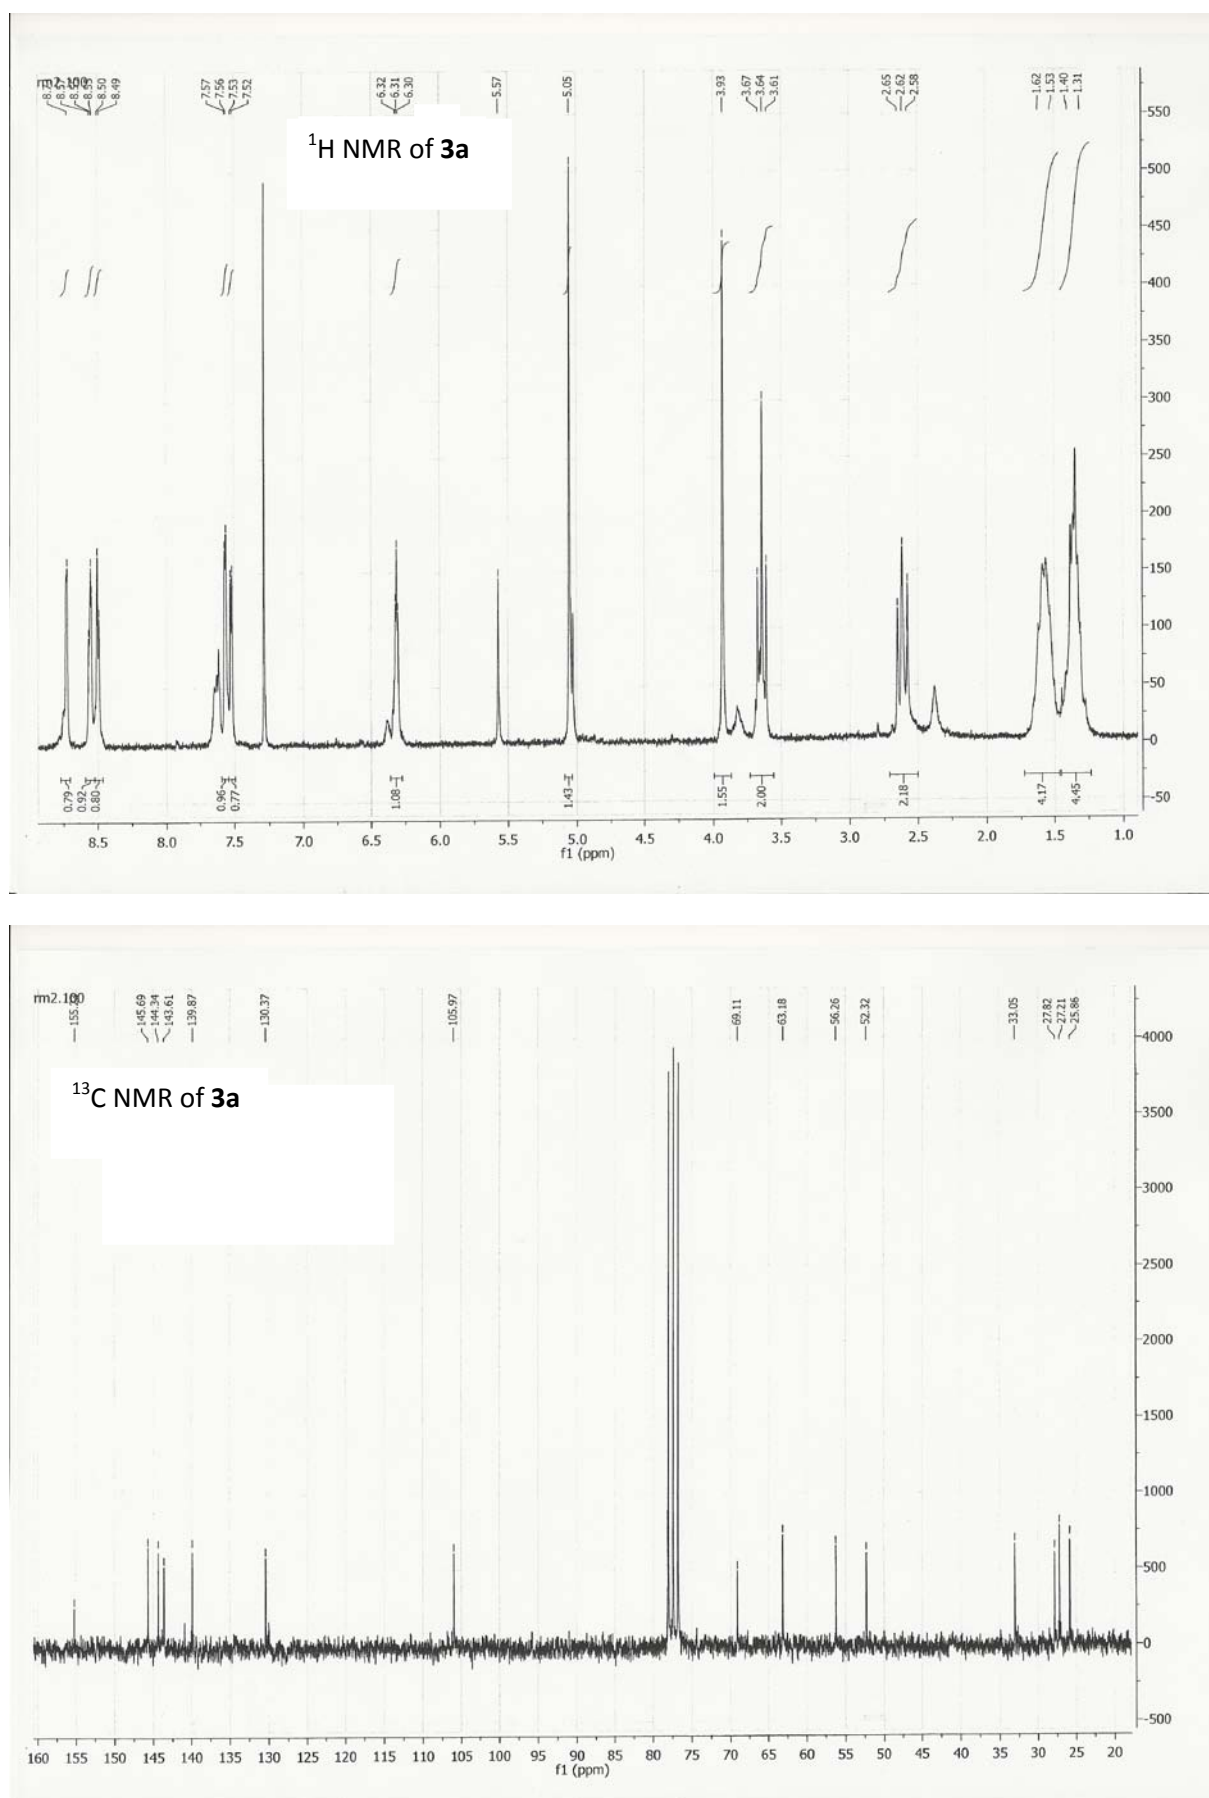

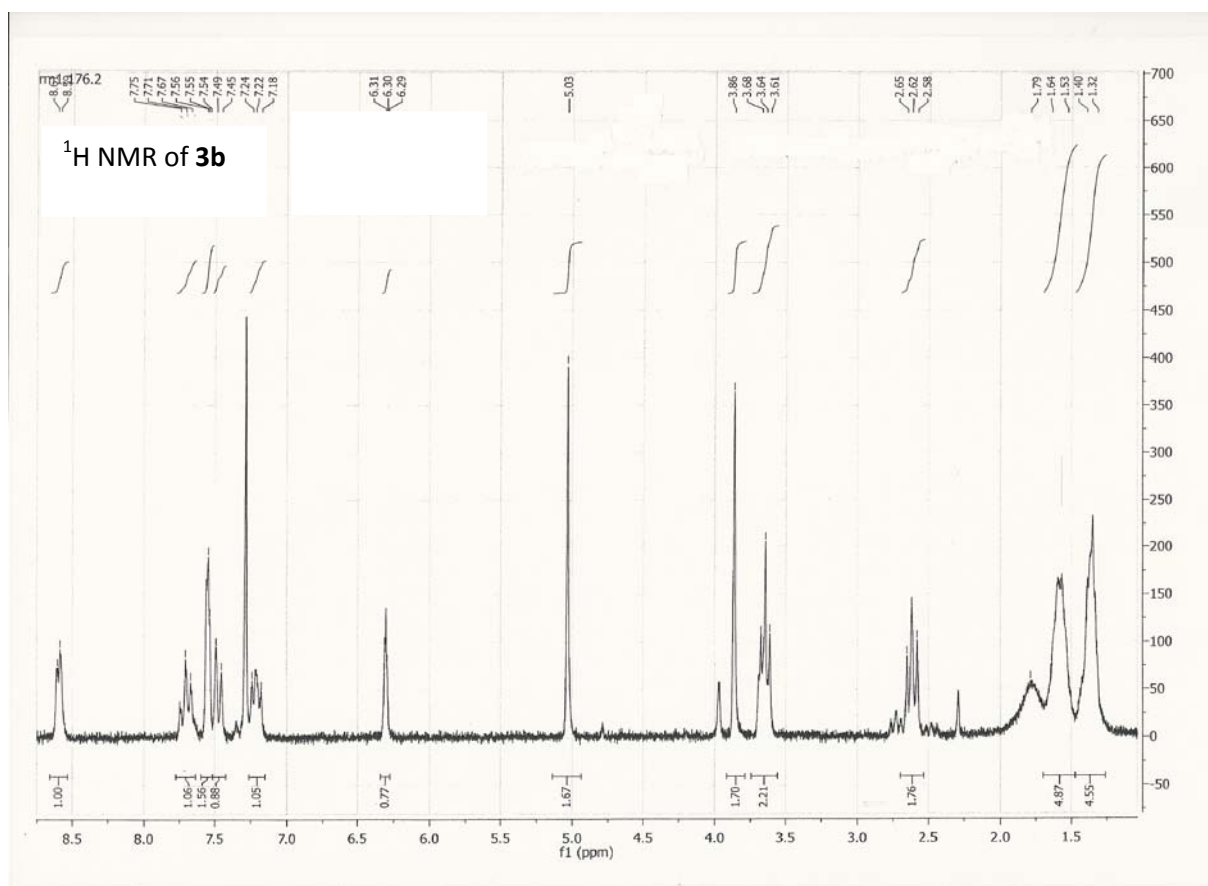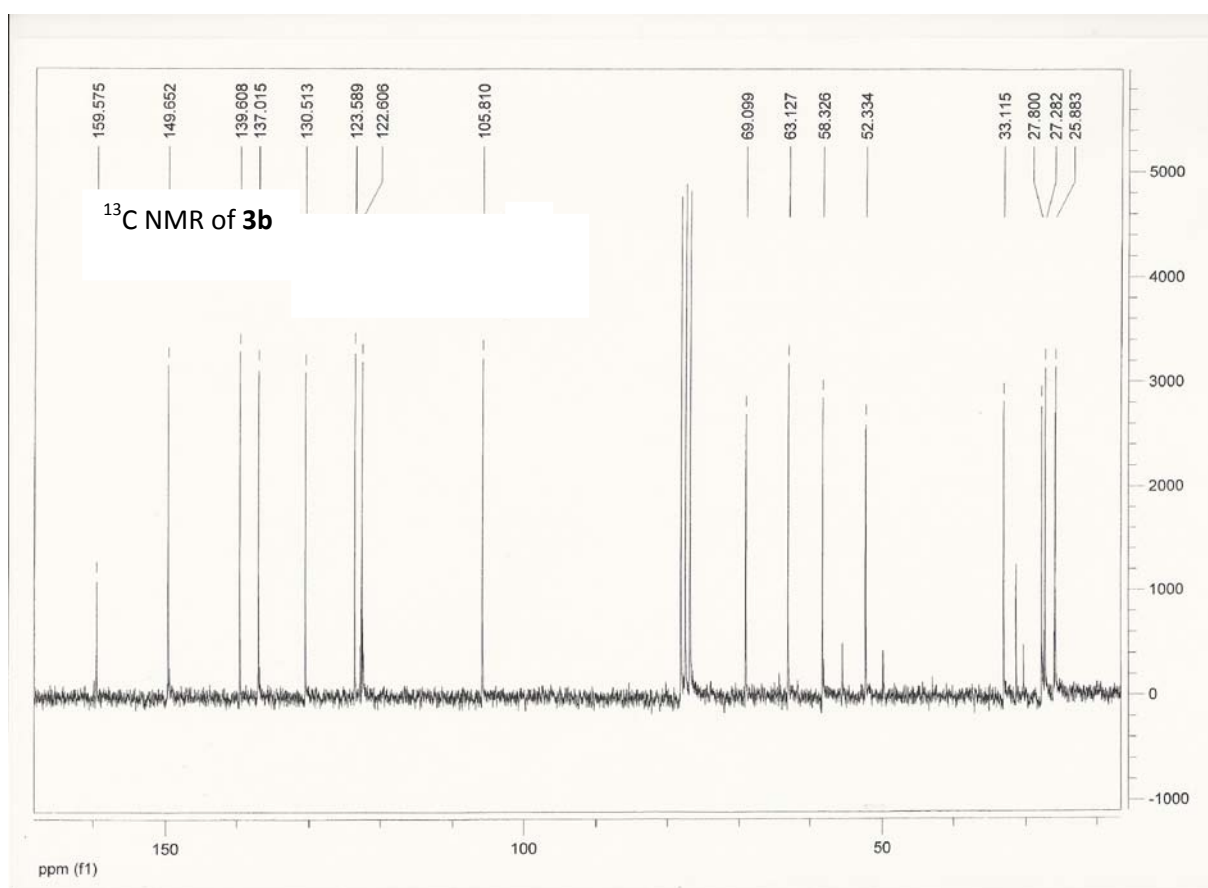

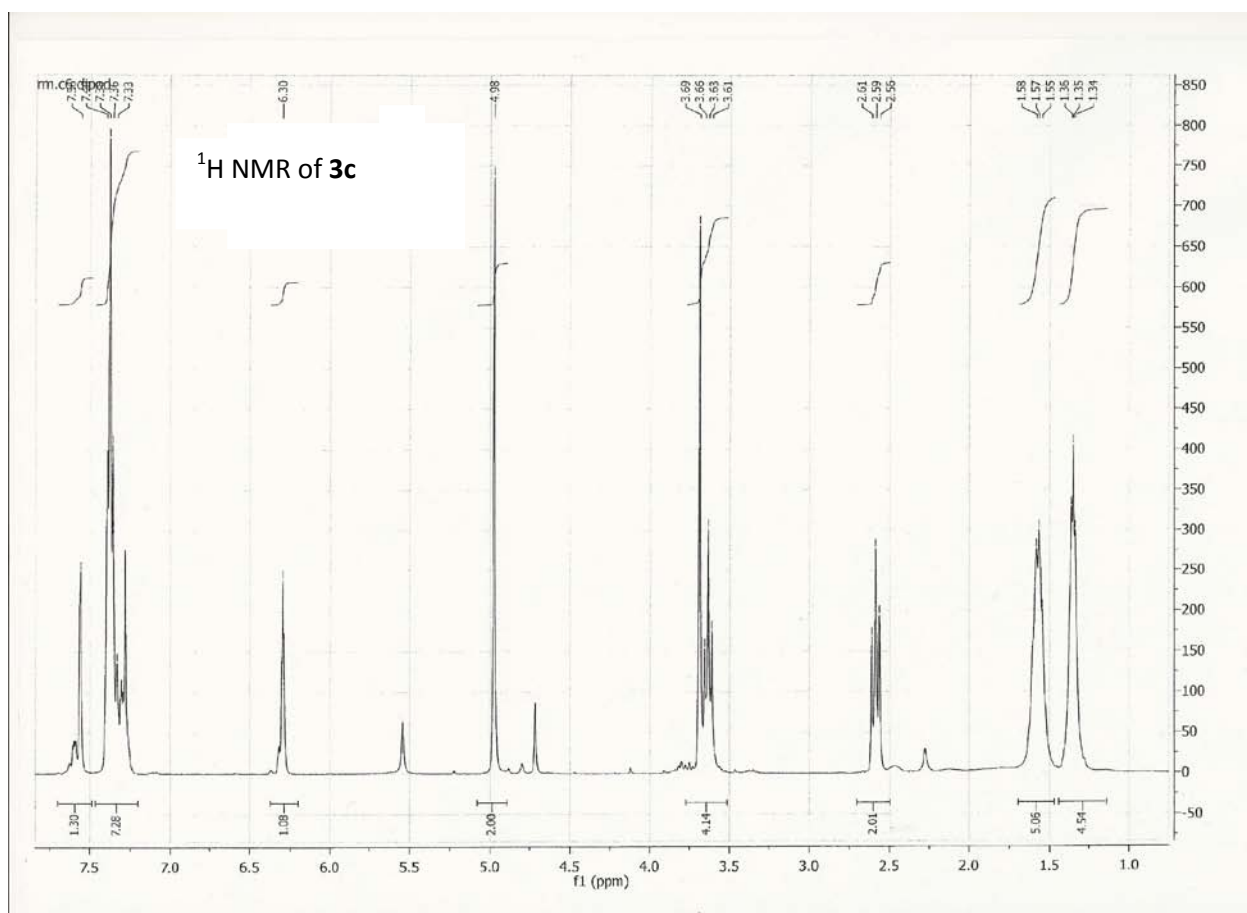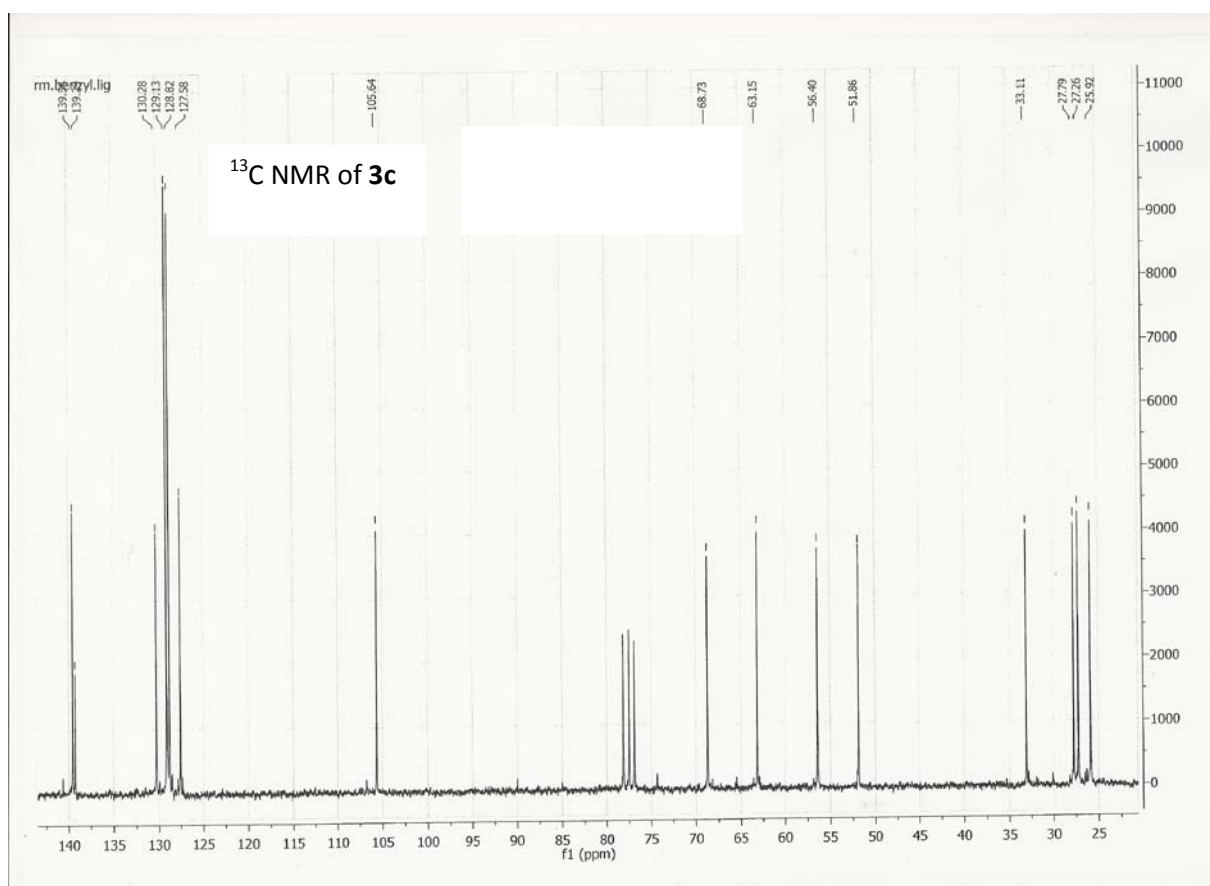

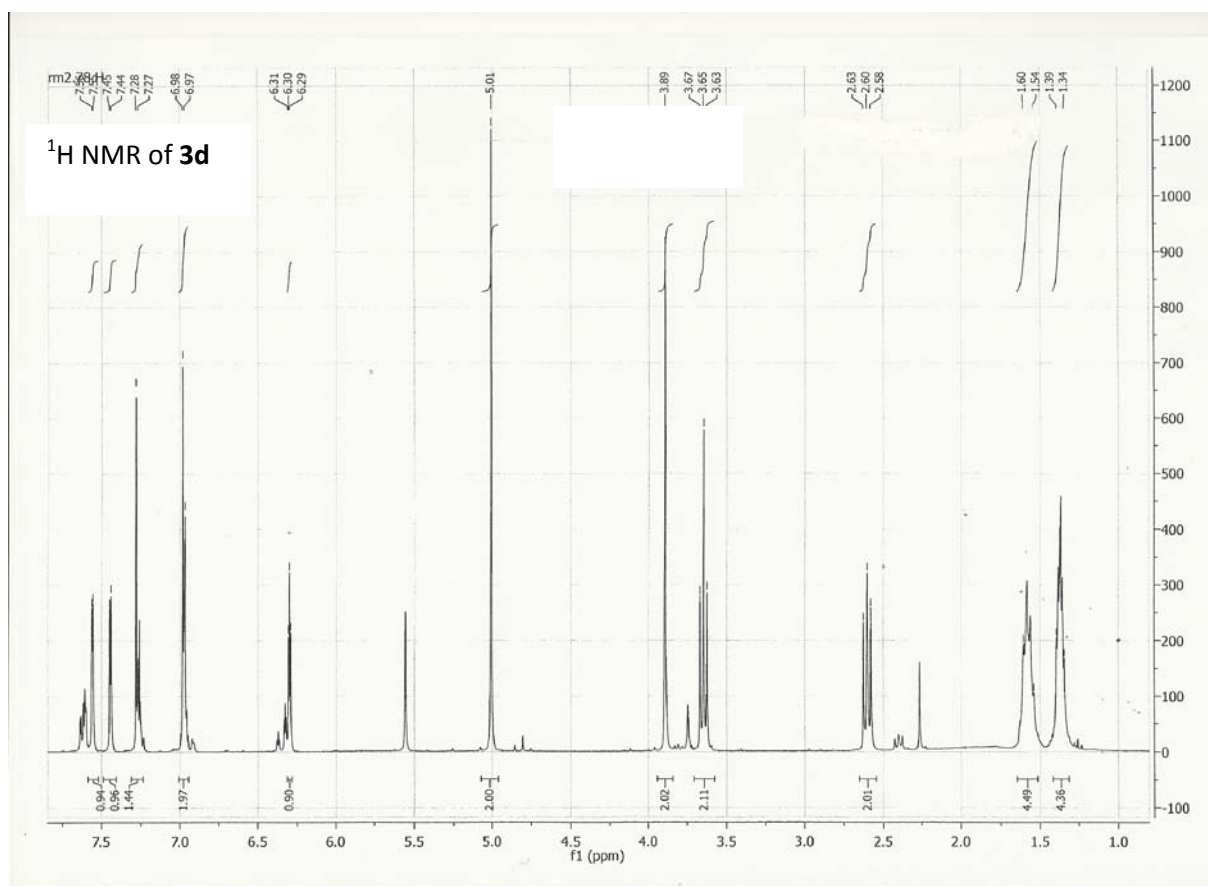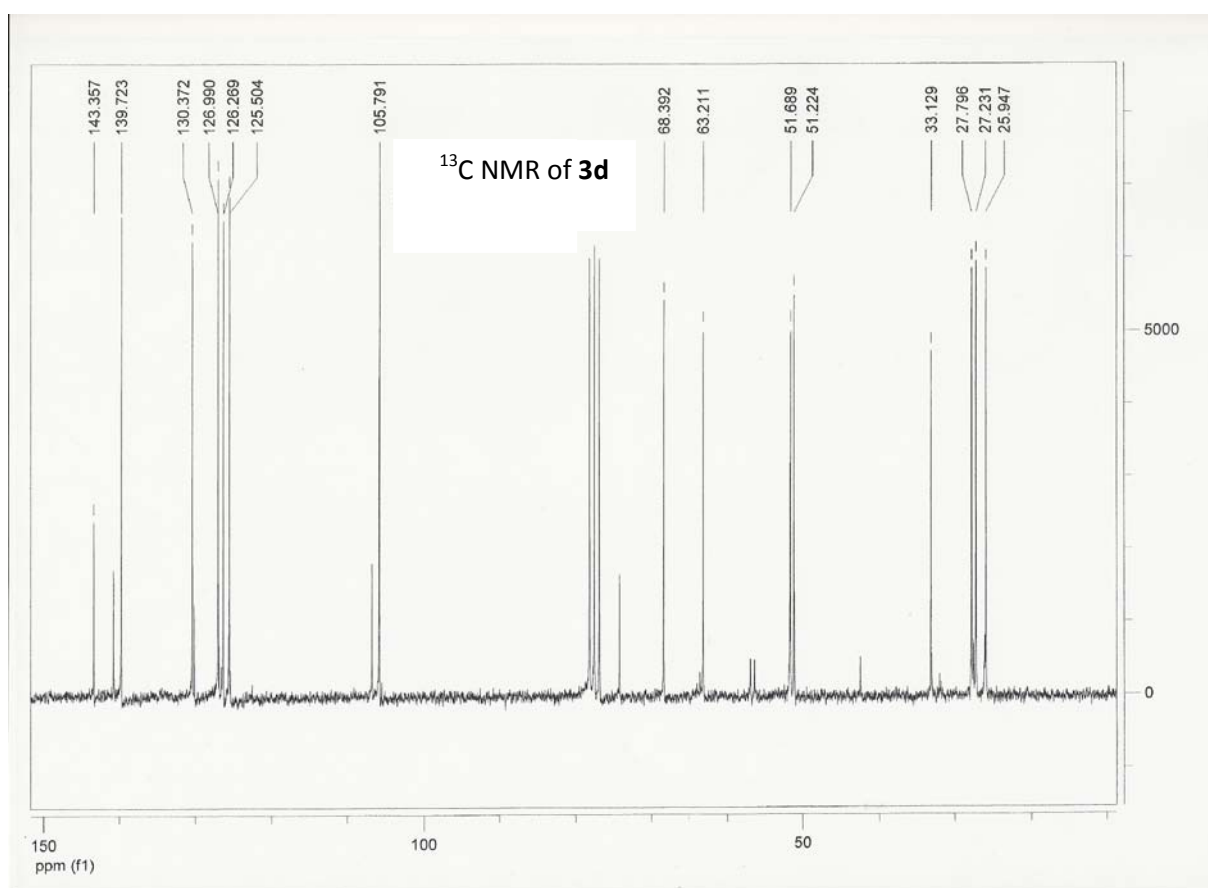

Supplement: c2nj40265c.pdf [file c2nj40265c.pdf]
